# Supplementary material for: Transcriptome analysis reveals novel regulatory mechanisms in a genome-reduced bacterium
Source: PubMed Central journal article supplement (PMC4245973; doi:10.1093/nar/gku976), 2014-10-31
Supplement: supp_gku976_nar-02483-x-2014-File007.pdf [file supp_gku976_nar-02483-x-2014-File007.pdf]

## Table of contents

[Table of contents](#)

[Supplementary Text](#)

[Dependence between RBS and protein abundance](#)

[RNA to protein correlation during heat shock](#)

[Supplementary Tables](#)

[Table S1. Sample information](#)

[Table S2. Real-time PCR](#)

[Table S3. Transcription intervals](#)

[Table S4. TSS position \(5-ERS\)](#)

[Table S5. Analysis of differential expression of CDS under different conditions](#)

[Table S6. GO-enrichment of stress-related genes](#)

[Table S7. GO-enrichment for clusters of heat shock related genes](#)

[Table S8. CIRCE matches](#)

[Table S9. GO-enrichment for TSS and TTs heat shock up-regulated genes regulated genes](#)

[Table S10. PWM of promoter sequence](#)

[Table S11. CDS read counts](#)

[Table S12. Protein abundance indexes](#)

[Table S13. Analysis of RNA to protein correlation within GO groups](#)

[Table S14. RT-PCR analysis of heat shock-related regulation of four selected hairpinless down-CS](#)

[Table S15. Transformation frequencies with different vector amount.](#)

[Table S16. Positions of vector integration sites.](#)

[Table S17. Transcription of tetM gene in transformants by RT-qPCR.](#)

[Supplementary Figures](#)

[Figure S1. Correlation heatmap for all RNA-Seq samples](#)

[Figure S2. Correlation between RT-PCR- and RNA-Seq-based gene expression estimates](#)

[Figure S3. Correlation between RT-PCR- and RNA-Seq-based gene expression fold change estimates](#)

[Figure S4. Sigma factor structure](#)

[Figure S5. Distribution of best match of promoter PWM in 100nt upstream of TSSs](#)

[Figure S6. AT-content near down-CS.](#)

[Figure S7. Ribosome binding energy](#)

[Figure S8. Dependence of FDR of -10 box and extension weights](#)

[Figure S9. Vector design for \*M. gallisepticum\* transformation](#)

[Figure S10. Alignment of upstream regions of rpsP \(prototype\), tetM and transposase.](#)

[Figure S11. Logo-image of -35 box](#)

[Figure S12. Dependence of TSS activity on number of mismatches in minus 35 box compared with consensus sequence \(TTGACA\)](#)



## Supplementary Text

### Dependence between RBS and protein abundancy

In addition to correlation analysis between RBS dG and protein or RNA abundance described in the main text, we analyzed contribution of length of spacer between RBS and start codon. Unfortunately, we observed only weak and insignificant correlation ( $\rho = -0.06$ ,  $p > 0.1$ ). Then we used linear models and ANOVA to investigate joint effect of dG and spacer. No one model (with and without interaction term, considering spacer as is or as absolute difference from optimal length (6 nt)) resulted in significant ( $p < 0.05$ ) contribution of either spacer length or interaction term.

### RNA to protein correlation during heat shock

As we shown in the main text, RNA-protein correlation drops during heat shock. To rather investigate it we grouped genes according to GO-terms and checked RNA to protein correlation for all GO-terms with at least 10 genes ( $N=33$ ). Two thirds (22) of gene groups exhibited drop in RNA to protein correlation. Three gene groups exhibited significant change in RNA to protein correlation (Williams's Test,  $p < 0.05$ ), for all of them correlation drops under heat shock (Supplementary table S13)

## Supplementary Tables

### Table S1. Sample information

see file Supplementary tables, TableS1-samples tab  
all samples are uploaded to SRA under project id PRJNA243934  
(<http://www.ncbi.nlm.nih.gov/bioproject/243934>)

### Table S2. Real-time PCR

**Table S2a**, RT-qPCR (see file Supplementary tables, TableS2a-RT-qPCR tab):  
replicate row - contains unique ID of the experiment, experiment may contain several conditions, conditions are indicated on the row below. One technical replicate per each biological replicate was used. Several genes were included twice per experiment to ensure reproducibility of the data.

Columns:

R(low) - locus tag of the homologous gene in *M. gallisepticum* R(low) genome

S6 - locus tag of *M. gallisepticum* S6

gene - gene's name according to trivial nomenclature used for bacteria, if exists

Data in the table is provided as raw  $C_t$  aligned by 23S rRNA  $C_t$ .

**Table S2b**, primers (see file Supplementary tables, TableS2b-PCR primers tab):

S6\_ID - locus tag of *M. gallisepticum* S6 to which the primers are designed

gene\_name - gene's name according to trivial nomenclature used for bacteria, if exists

for - forward primer

rev - reverse primer

Primers are designed to have  $T_m$  from 58° to 62°C with no more than 2°C difference in  $T_m$ .  $T_m$  was calculated according to SantaLucia method (SantaLucia J. 1998. A unified view of polymer, dumbbell, and oligonucleotide DNA nearest-neighbor thermodynamics. *PNAS* 95(4):1460-1465). Amplicons length was designed to be 300-310 b.p. on average. PCR was performed according to the following protocol: 96°C for 15 sec, 58°C for 20 sec, 65°C for 1 min for 40 cycles with 5 pmol of each primer per 21  $\mu$ l of reaction mixture.

### Table S3. Transcription intervals

see file Supplementary tables, TableS3-intervals tab

File contains information about coverage steps (transcription intervals). It consists of following columns, from left to right:

**pos:** genome position of border (leftmost position of corresponding interval)

**cov:** average coverage by all samples from DS2

**dir:** direction of coverage step at given position (**up** or **down**)

**strand:** strand of interval

**has.gene:** whether given interval overlap gene by more than 50% of gene length

**operon\_id:** intervals with the same operon id belong to single operon. Interval is not expressed if operon\_id is NA

**is.primary:** whether this border is first or last border of operon

**term.pos:** genome position of nearest hairpin

**tss.pos:** genome position of nearest 5'-ERS-identified TSS

### Table S4. TSS position (5-ERS)

see file Supplementary tables, TableS4-TSSs tab

File contains information about 5'-ERS-identified TSS. It consists of following columns, from left to right:

**pos:** genome position of TSS

**strand:** strand of TSS

**spacer length:** length of spacer between -10 box and TSS

**gene\_id:** id of nearest gene

**tataat.seq:** sequence of -10 box

Number of reads that mapped to each TSS in each sample are shown in remaining four columns.

### Table S5. Analysis of differential expression of CDS under different conditions

see file Supplementary tables, TableS5-diffexpression tab

For each CDS and condition BH-corrected p-value and log2 fold change is shown. Cluster name is shown in the last column for each heat shock related CDS.

**Table S6. GO-enrichment of stress-related genes**

Significantly enriched terms ( $q_v$  (BH-corrected p-value) is below 0.2) for each stress and direction of change are listed in table below. Only contitions/change directions that have at least one significant term are shown. Number of genes in given term and number of them that change expression significantly in given direction and under given condition are shown in “size” and “sel. size” columns respectively

| <b>h2o2 up</b>    |         |          |                                                               |      |           |
|-------------------|---------|----------|---------------------------------------------------------------|------|-----------|
| category          | qv.over | ontology | term                                                          | size | sel. size |
| GO:0004030        | 0.03    | MF       | aldehyde dehydrogenase [NAD(P)+] activity                     | 4    | 3         |
| GO:0006081        | 0.0094  | BP       | cellular aldehyde metabolic process                           | 4    | 3         |
| GO:0006084        | 0.0094  | BP       | acetyl-CoA metabolic process                                  | 4    | 3         |
| GO:0016226        | 0.0094  | BP       | iron-sulfur cluster assembly                                  | 4    | 3         |
| GO:0055114        | 0.021   | BP       | oxidation-reduction process                                   | 37   | 7         |
| <b>h2o2 down</b>  |         |          |                                                               |      |           |
| GO:0005694        | 0.19    | CC       | chromosome                                                    | 7    | 2         |
| GO:0045261        | 0.19    | CC       | proton-transporting ATP synthase complex, catalytic core F(1) | 9    | 2         |
| <b>nacl up</b>    |         |          |                                                               |      |           |
| GO:0004030        | 0.078   | MF       | aldehyde dehydrogenase [NAD(P)+] activity                     | 4    | 3         |
| GO:0006081        | 0.037   | BP       | cellular aldehyde metabolic process                           | 4    | 3         |
| GO:0006084        | 0.037   | BP       | acetyl-CoA metabolic process                                  | 4    | 3         |
| GO:0004519        | 0.18    | MF       | endonuclease activity                                         | 6    | 3         |
| GO:0006950        | 0.19    | BP       | response to stress                                            | 7    | 3         |
| <b>stat. up</b>   |         |          |                                                               |      |           |
| GO:0006950        | 0.0000  | 4 BP     | response to stress                                            | 7    | 5         |
| GO:0055114        | 0.0036  | BP       | oxidation-reduction process                                   | 37   | 7         |
| GO:0006096        | 0.0099  | BP       | glycolysis                                                    | 12   | 4         |
| <b>stat. down</b> |         |          |                                                               |      |           |
| GO:0016021        | 0.07    | CC       | integral component of membrane                                | 49   | 48        |
| <b>hs5 up</b>     |         |          |                                                               |      |           |
| GO:0004252        | 0.0027  | MF       | serine-type endopeptidase activity                            | 8    | 6         |
| <b>hs5 down</b>   |         |          |                                                               |      |           |
| GO:0016773        | 0.066   | MF       | phosphotransferase activity, alcohol group as acceptor        | 3    | 3         |
| <b>hs15 up</b>    |         |          |                                                               |      |           |
| GO:0004803        | 0.041   | MF       | transposase activity                                          | 24   | 13        |
| GO:0006313        | 0.044   | BP       | transposition, DNA-mediated                                   | 24   | 13        |
| GO:0003677        | 0.041   | MF       | DNA binding                                                   | 77   | 29        |
| GO:0055085        | 0.044   | BP       | transmembrane transport                                       | 12   | 8         |

|                  |       |    |                                                                  |    |    |
|------------------|-------|----|------------------------------------------------------------------|----|----|
| GO:0042626       | 0.042 | MF | ATPase activity, coupled to transmembrane movement of substances | 10 | 7  |
| GO:0004252       | 0.042 | MF | serine-type endopeptidase activity                               | 8  | 6  |
| GO:0008982       | 0.15  | MF | protein-N(PI)-phosphohistidine-sugar phosphotransferase activity | 5  | 4  |
| GO:0006304       | 0.19  | BP | DNA modification                                                 | 3  | 3  |
| GO:0008643       | 0.19  | BP | carbohydrate transport                                           | 3  | 3  |
| <b>hs15 down</b> |       |    |                                                                  |    |    |
| GO:0019843       | 0.07  | MF | rRNA binding                                                     | 33 | 16 |
| GO:0003676       | 0.07  | MF | nucleic acid binding                                             | 10 | 7  |
| GO:0003735       | 0.07  | MF | structural constituent of ribosome                               | 51 | 21 |
| <b>hs30 up</b>   |       |    |                                                                  |    |    |
| GO:0055085       | 0.069 | BP | transmembrane transport                                          | 12 | 8  |
| GO:0042626       | 0.07  | MF | ATPase activity, coupled to transmembrane movement of substances | 10 | 7  |
| GO:0004252       | 0.07  | MF | serine-type endopeptidase activity                               | 8  | 6  |
| GO:0003677       | 0.17  | MF | DNA binding                                                      | 77 | 26 |
| GO:0008982       | 0.17  | MF | protein-N(PI)-phosphohistidine-sugar phosphotransferase activity | 5  | 4  |
| <b>hs30 down</b> |       |    |                                                                  |    |    |
| GO:0006412       | 0.043 | BP | translation                                                      | 53 | 25 |
| GO:0003735       | 0.056 | MF | structural constituent of ribosome                               | 51 | 24 |
| GO:0019843       | 0.056 | MF | rRNA binding                                                     | 33 | 17 |
| GO:0006096       | 0.13  | BP | glycolysis                                                       | 12 | 8  |
| GO:0005840       | 0.1   | CC | ribosome                                                         | 40 | 18 |

**Table S7. GO-enrichment for clusters of heat shock related genes**

Significantly enriched terms (qv (BH-corrected p-value) is below 0.2) for each cluster are listed in table below. Only clusters that have at least one significant term are shown. Number of genes in given term and number of them from given cluster are shown in “size” and “sel. size” columns respectively

| <b>c1</b>  |           |          |                                    |      |           |
|------------|-----------|----------|------------------------------------|------|-----------|
| category   | qv.over   | ontology | term                               | size | sel. size |
| GO:0006412 | 0.0000037 | BP       | translation                        | 53   | 25        |
| GO:0003735 | 0.0000084 | MF       | structural constituent of ribosome | 51   | 24        |
| GO:0019843 | 0.000088  | MF       | rRNA binding                       | 33   | 17        |
| GO:0005840 | 0.00019   | CC       | ribosome                           | 40   | 18        |
| GO:0006096 | 0.0048    | BP       | glycolysis                         | 12   | 8         |
| <b>c2</b>  |           |          |                                    |      |           |
| GO:0004803 | 0.00017   | MF       | transposase activity               | 24   | 12        |
| GO:0006313 | 0.00016   | BP       | transposition, DNA-mediated        | 24   | 12        |

|            |        |    |                                                                  |    |   |
|------------|--------|----|------------------------------------------------------------------|----|---|
| GO:0004252 | 0.029  | MF | serine-type endopeptidase activity                               | 8  | 5 |
| <b>c3</b>  |        |    |                                                                  |    |   |
| GO:0055085 | 0.054  | BP | transmembrane transport                                          | 12 | 6 |
| GO:0008643 | 0.054  | BP | carbohydrate transport                                           | 3  | 3 |
| GO:0042626 | 0.11   | MF | ATPase activity, coupled to transmembrane movement of substances | 10 | 5 |
| GO:0003887 | 0.11   | MF | DNA-directed DNA polymerase activity                             | 7  | 4 |
| GO:0004030 | 0.11   | MF | aldehyde dehydrogenase [NAD(P)+] activity                        | 4  | 3 |
| GO:0006081 | 0.13   | BP | cellular aldehyde metabolic process                              | 4  | 3 |
| GO:0008408 | 0.11   | MF | 3'-5' exonuclease activity                                       | 4  | 3 |
| <b>c4</b>  |        |    |                                                                  |    |   |
| GO:0016773 | 0.0087 | MF | phosphotransferase activity, alcohol group as acceptor           | 3  | 3 |
| GO:0005525 | 0.05   | MF | GTP binding                                                      | 19 | 5 |
| GO:0003924 | 0.05   | MF | GTPase activity                                                  | 12 | 4 |
| GO:0006184 | 0.14   | BP | GTP catabolic process                                            | 12 | 4 |
| GO:0016310 | 0.18   | BP | phosphorylation                                                  | 24 | 5 |
| <b>c9</b>  |        |    |                                                                  |    |   |
| GO:0003735 | 0.012  | MF | structural constituent of ribosome                               | 51 | 6 |
| GO:0005840 | 0.0075 | CC | ribosome                                                         | 40 | 5 |
| GO:0006412 | 0.14   | BP | translation                                                      | 53 | 5 |

**Table S8. CIRCE matches**

CIRCE elements identified in *M. gallisepticum* S6 genome with 2 or less mismatches.

| ID_S6     | start  | end    | seq                                               | gene name | distance to CDS | distance to -10 box |
|-----------|--------|--------|---------------------------------------------------|-----------|-----------------|---------------------|
| consensus |        |        | TTAGCACTC N N N N N N N N G A G T G C T A A       |           |                 |                     |
| Site_9    | 188835 | 188861 | TTATC A C T T TAGCTCTTAGAGTGCTAA                  | dnaJ_2    | 61              | overlap by 3 bp     |
| Site_10   | 194321 | 194347 | TTATC A C T T TAGCTCTTAGAGTGCTAA                  | GCW_90867 | 324             | overlap by 3 bp     |
| Site_11   | 494450 | 494476 | TTAGCACTTGAATTATTAGAGTGCTAA                       | lon       | 62              | 13                  |
| Site_12   | 662204 | 662230 | TTATC A C T C T A A T A G C C T A A G T G C T A A | clpB      | 43              | 8                   |
| Site_13   | 732791 | 732817 | TTAGCAATCTACTTGCAAAAGTGCTAA                       | dnaK      | 92              | 8                   |

**Table S9. GO-enrichment for TSS and TTs heat shock up-regulated genes regulated genes**

Significantly enriched terms (qv (BH-corrected p-value) is below 0.2) for TSS- and TT-regulated genes that significantly up-regulated after 30 min of heat shock. Number of genes in given term and number of them from given cluster are shown in “size” and “sel. size” columns respectively

| <b>Terminator regulated genes</b> |         |          |                                                                  |      |           |
|-----------------------------------|---------|----------|------------------------------------------------------------------|------|-----------|
| category                          | qv.over | ontology | term                                                             | size | sel. size |
| GO:0055085                        | 0.021   | BP       | transmembrane transport                                          | 12   | 6         |
| GO:0008643                        | 0.026   | BP       | carbohydrate transport                                           | 3    | 3         |
| GO:0042626                        | 0.075   | MF       | ATPase activity, coupled to transmembrane movement of substances | 10   | 5         |
| <b>TSS regulated genes</b>        |         |          |                                                                  |      |           |
| GO:0004252                        | 0.0056  | MF       | serine-type endopeptidase activity                               | 8    | 6         |
| GO:0004803                        | 0.051   | MF       | transposase activity                                             | 24   | 9         |
| GO:0006313                        | 0.095   | BP       | transposition, DNA-mediated                                      | 24   | 9         |
| GO:0006950                        | 0.12    | BP       | response to stress                                               | 7    | 4         |
| GO:0006508                        | 0.12    | BP       | proteolysis                                                      | 24   | 8         |
| GO:0004030                        | 0.16    | MF       | aldehyde dehydrogenase [NAD(P)+] activity                        | 4    | 3         |
| GO:0006081                        | 0.12    | BP       | cellular aldehyde metabolic process                              | 4    | 3         |
| GO:0005351                        | 0.16    | MF       | sugar:hydrogen symporter activity                                | 8    | 4         |
| GO:0009401                        | 0.15    | BP       | phosphoenolpyruvate-dependent sugar phosphotransferase system    | 8    | 4         |
| GO:0051082                        | 0.16    | MF       | unfolded protein binding                                         | 8    | 4         |
| GO:0008982                        | 0.19    | MF       | protein-N(P)-phosphohistidine-sugar phosphotransferase activity  | 5    | 3         |

**Table S10. PWM of promoter sequence**

see file Supplementary tables, TableS10-TSS PWM tab

Matrix contains weights (log2 of ratio of observed and background (genome-wide) nt frequencies) for each position (columns) and each of four nucleotides.

**Table S11. CDS read counts**

see file Supplementary tables, TableS11-CDS read count tab

**Table S12. Protein abundance indexes**

see file Supplementary tables, TableS12-PAI tab



**Table S13. Analysis of RNA to protein correlation within GO groups**  
Only GO terms with at least 10 genes are shown.

| term       | description                        | gene count | control | hs5    | hs15  | hs30   | p-value(control-hs30) |
|------------|------------------------------------|------------|---------|--------|-------|--------|-----------------------|
| GO:0000049 | tRNA binding                       | 15         | 0.493   | 0.52   | 0.596 | 0.561  | 0.8164                |
| GO:0000287 | magnesium ion binding              | 17         | 0.662   | 0.605  | 0.715 | 0.631  | 0.8903                |
| GO:0003677 | DNA binding                        | 64         | 0.425   | 0.456  | 0.201 | 0.125  | 0.0698                |
| GO:0003723 | RNA binding                        | 17         | 0.525   | 0.664  | 0.4   | 0.443  | 0.7762                |
| GO:0003735 | structural constituent of ribosome | 49         | -0.079  | 0.075  | 0.065 | -0.001 | 0.7088                |
| GO:0003924 | GTPase activity                    | 10         | 0.875   | 0.612  | 0.648 | 0.729  | 0.4233                |
| GO:0004803 | transposase activity               | 20         | 0.665   | 0.718  | 0.828 | 0.801  | 0.3797                |
| GO:0005515 | protein binding                    | 11         | 0.555   | 0.573  | 0.418 | 0.023  | 0.2285                |
| GO:0005524 | ATP binding                        | 111        | 0.566   | 0.484  | 0.383 | 0.397  | 0.1051                |
| GO:0005525 | GTP binding                        | 17         | 0.746   | 0.357  | 0.408 | 0.329  | 0.1004                |
| GO:0005737 | cytoplasm                          | 120        | 0.701   | 0.594  | 0.477 | 0.444  | 0.0027                |
| GO:0005840 | ribosome                           | 37         | 0.077   | -0.016 | 0.035 | -0.03  | 0.6588                |
| GO:0005886 | plasma membrane                    | 34         | 0.62    | 0.453  | 0.569 | 0.692  | 0.6212                |
| GO:0006096 | glycolysis                         | 12         | 0.326   | 0.657  | 0.683 | 0.566  | 0.5187                |
| GO:0006184 | GTP catabolic process              | 10         | 0.875   | 0.612  | 0.648 | 0.729  | 0.4233                |
| GO:0006200 | ATP catabolic process              | 20         | 0.474   | 0.528  | 0.584 | 0.512  | 0.8814                |
| GO:0006260 | DNA replication                    | 21         | 0.732   | 0.675  | 0.684 | 0.243  | 0.0395                |
| GO:0006313 | transposition, DNA-mediated        | 20         | 0.665   | 0.718  | 0.828 | 0.801  | 0.3797                |
| GO:0006412 | translation                        | 51         | -0.041  | 0.017  | 0.038 | -0.031 | 0.9593                |
| GO:0006457 | protein folding                    | 12         | 0.872   | 0.755  | 0.399 | 0.406  | 0.0531                |
| GO:0006508 | proteolysis                        | 18         | 0.51    | -0.143 | 0.205 | 0.135  | 0.2426                |
| GO:0006810 | transport                          | 14         | 0.297   | 0.479  | 0.711 | 0.528  | 0.51                  |
| GO:0008152 | metabolic process                  | 14         | 0.763   | 0.774  | 0.56  | 0.516  | 0.3122                |
| GO:0008270 | zinc ion binding                   | 19         | 0.391   | 0.442  | 0.222 | 0.168  | 0.4913                |
| GO:0016020 | membrane                           | 17         | 0.273   | 0.199  | 0.347 | 0.108  | 0.6504                |
| GO:0016021 | integral component of membrane     | 25         | 0.516   | 0.482  | 0.623 | 0.641  | 0.5318                |
| GO:0016310 | phosphorylation                    | 21         | 0.879   | 0.725  | 0.705 | 0.668  | 0.0897                |
| GO:0016740 | transferase activity               | 10         | 0.527   | 0.612  | 0.212 | 0.37   | 0.7107                |

|            |                                             |    |       |       |       |       |        |
|------------|---------------------------------------------|----|-------|-------|-------|-------|--------|
| GO:0016887 | ATPase activity                             | 17 | 0.559 | 0.62  | 0.651 | 0.554 | 0.985  |
| GO:0019843 | rRNA binding                                | 33 | 0.08  | 0.258 | 0.15  | 0.146 | 0.794  |
| GO:0046872 | metal ion binding                           | 28 | 0.706 | 0.581 | 0.6   | 0.698 | 0.9574 |
| GO:0055114 | oxidation-reduction process                 | 33 | 0.88  | 0.773 | 0.669 | 0.537 | 0.0027 |
| GO:0090305 | nucleic acid phosphodiester bond hydrolysis | 19 | 0.544 | 0.525 | 0.417 | 0.109 | 0.1573 |

**Table S14. RT-PCR analysis of heat shock-related regulation of four selected hairpinless down-CS**

Normalized threshold cycle for three controls (C-1, 2 and 3) and three heat stresses (HS30-1, 2, and 3) samples. Two pairs of primers were designed for each down-CS: upstream of down-CS (Up) and downstream of down-CS (down). Used primers are listed at the bottom of primer table of supplementaryTableS2.PCR.xls.

| Step ID | C-1   |       | HS30-1 |       | C-2   |       | HS30-2 |       | C-3   |       | HS30-3 |       |
|---------|-------|-------|--------|-------|-------|-------|--------|-------|-------|-------|--------|-------|
|         | Up    | Dn    | Up     | Dn    | Up    | Dn    | Up     | Dn    | Up    | Dn    | Up     | Dn    |
| 8       | 25.73 | 29.26 | 25.4   | 26.12 | 25.26 | 27.78 | 23.98  | 24.29 | 26.35 | 29.24 | 25.3   | 25.71 |
| 19      | 23.23 | 25.75 | 25.06  | 25.58 | 23.12 | 25.13 | 24.23  | 24.85 | 24.06 | 25.72 | 25.44  | 26.17 |
| 119     | 23.22 | 24.2  | 24.41  | 24.05 | 22.21 | 22.42 | 22.67  | 21.76 | 23.16 | 23.31 | 23.81  | 23.16 |
| 1008    | 24.02 | 23.46 | 23.22  | 22.62 | 24.3  | 23.38 | 22.1   | 20.3  | 23.94 | 24.06 | 23.11  | 22.13 |

**Table S15. Transformation frequencies with different vector amount.**

| Plasmid amount | CFU per 10 <sup>9</sup> cells (1 ml of late-logarithm culture) | Transformation efficiency |
|----------------|----------------------------------------------------------------|---------------------------|
| 10 µg          | 10 <sup>3</sup>                                                | 10 <sup>-06</sup>         |
| 1 µg           | 10 <sup>3</sup>                                                | 10 <sup>-06</sup>         |
| 100 ng         | 10 <sup>3</sup>                                                | 10 <sup>-06</sup>         |
| 10 ng          | 2*10 <sup>2</sup>                                              | 2*10 <sup>-07</sup>       |
| 1 ng           | 30-50                                                          | 2*10 <sup>-08</sup>       |

**Table S16. Positions of vector integration sites.**

| Clone   | Position | Locus                                    |
|---------|----------|------------------------------------------|
| clone-1 | 931568   | Intergenic region                        |
| clone-2 | 960197   | GCW_03980 - hypothetical protein         |
| clone-4 | 242561   | GCW_01075 - <i>spoT</i> , ppGpp synthase |

**Table S17. Transcription of *tetM* gene in transformants by RT-qPCR.**

ND - not detected

|                  | clone-1 | clone-2 | clone-3 | clone-4 |
|------------------|---------|---------|---------|---------|
| transposase rep1 | ND      | ND      | ND      | ND      |
| transposase rep2 | ND      | ND      | ND      | ND      |
| <i>tetM</i> rep1 | 22,38   | 17,18   | 16,48   | 18,96   |
| <i>tetM</i> rep2 | 22,52   | 17,47   | 16,68   | 19,14   |
| <i>gapd</i> rep1 | 22,48   | 20,24   | 20,36   | 20,33   |
| <i>gapd</i> rep2 | 22,79   | 20,64   | 20,60   | 20,75   |
| <i>eno</i> rep1  | 23,67   | 21,86   | 22,76   | 21,85   |
| <i>eno</i> rep2  | 23,37   | 22,18   | 22,02   | 21,73   |

## Supplementary Figures

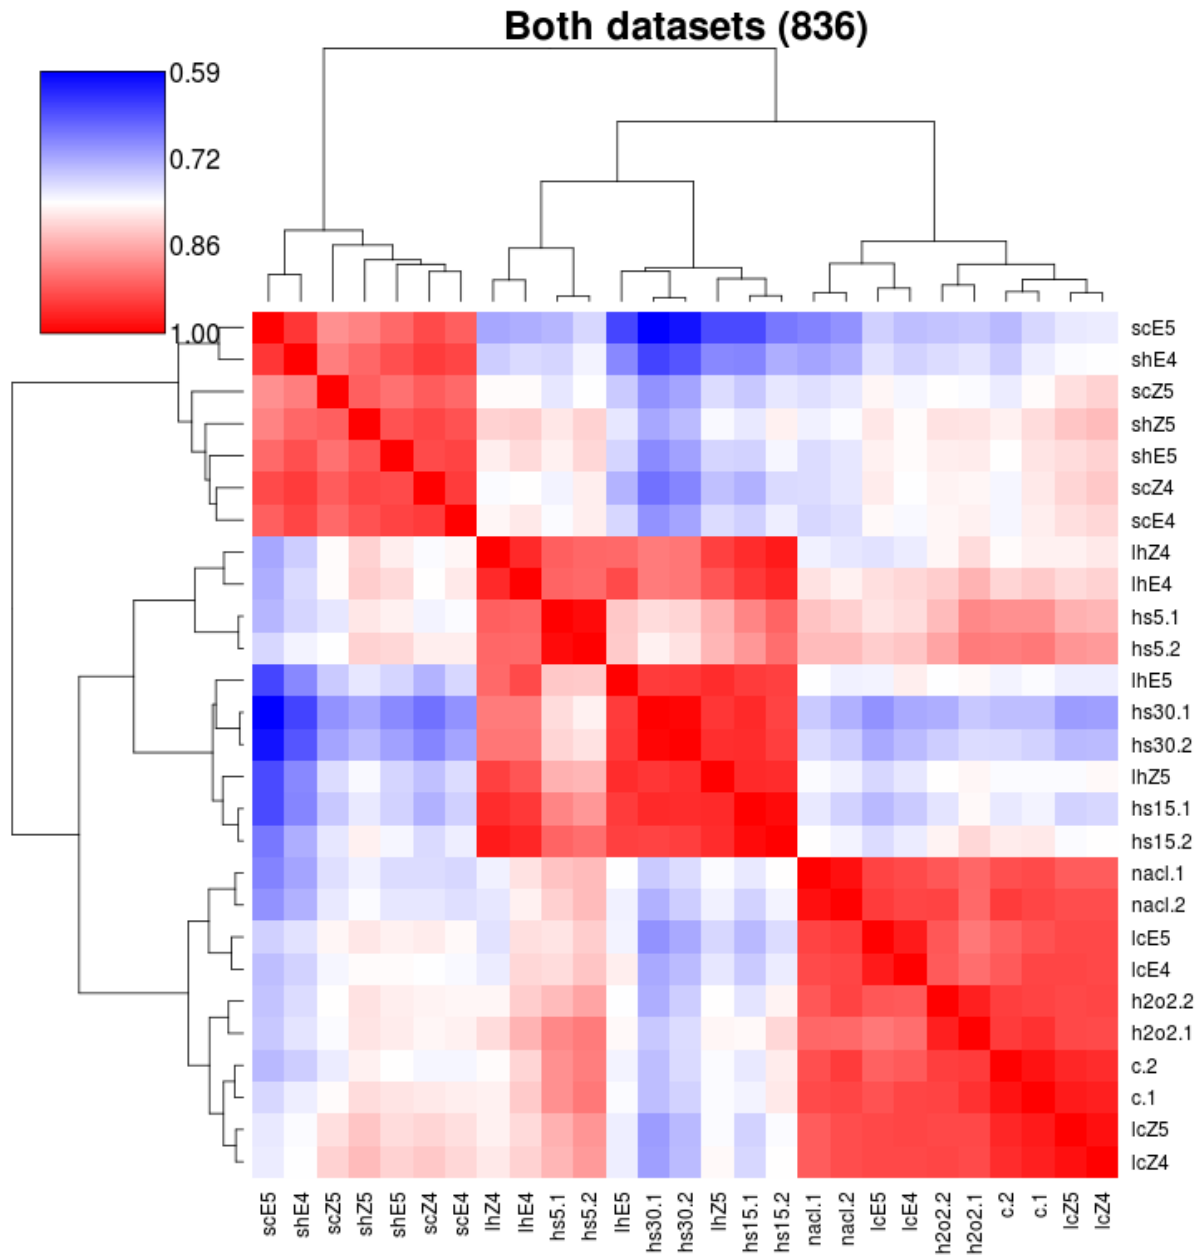

**Figure S1. Correlation heatmap for all RNA-Seq samples**

Spearman correlation of CDS read counts for all RNA-Seq samples is shown by heatmap. Samples were reordered by hierarchical clustering using complete linkage and 1-cor as distance.

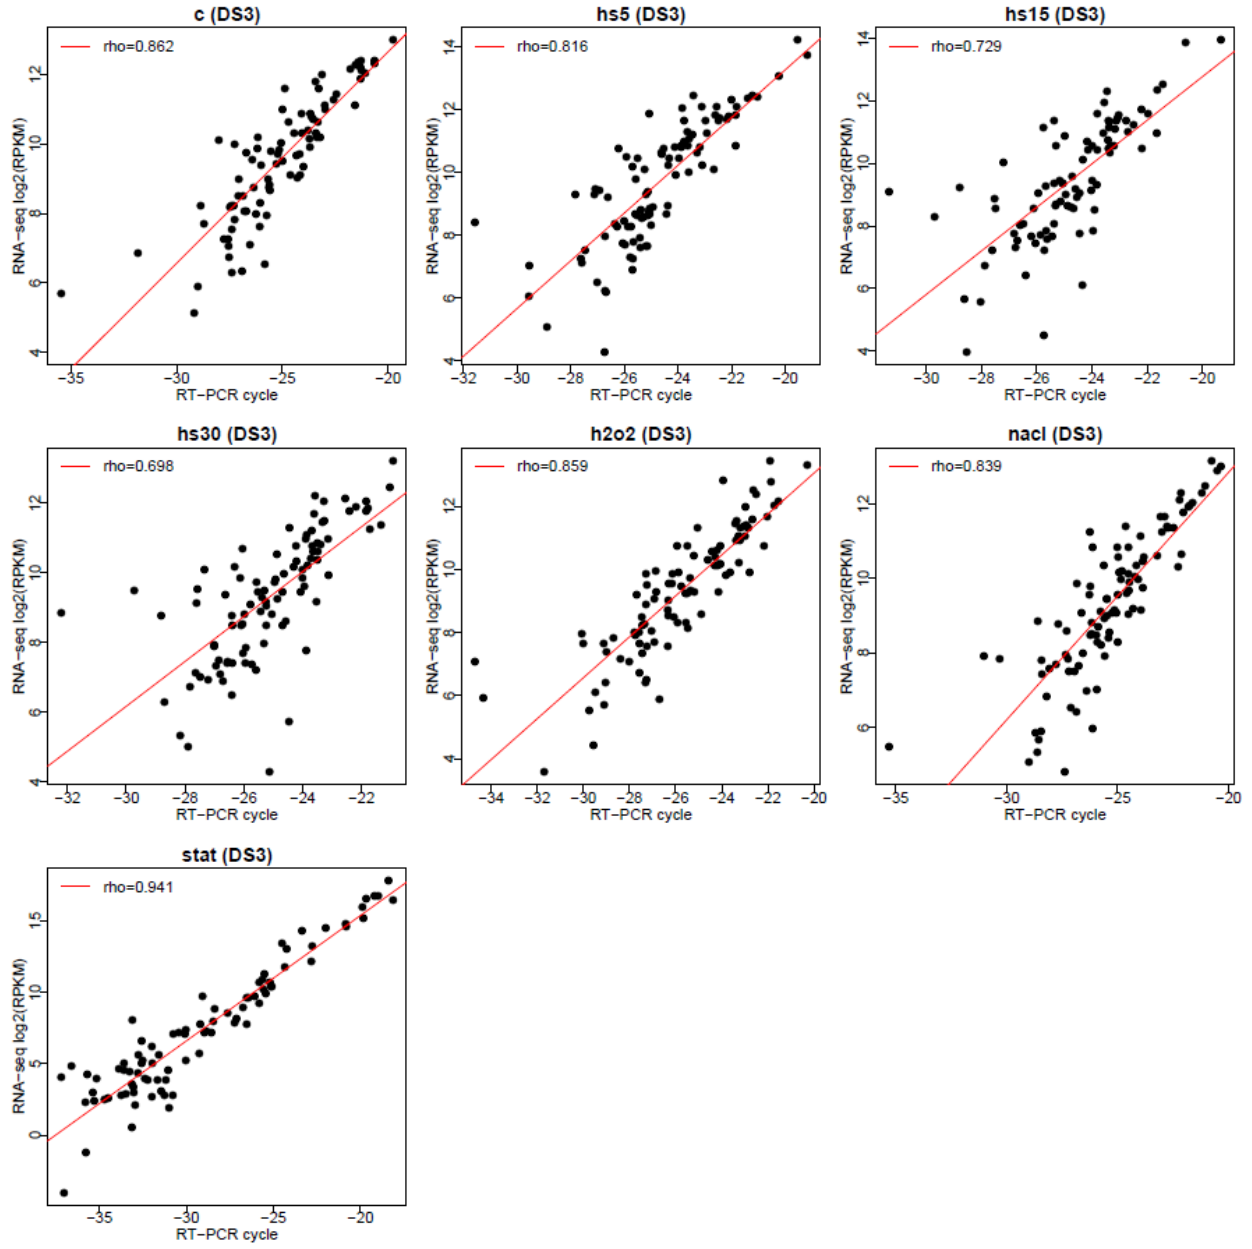

**Figure S2. Correlation between RT-PCR- and RNA-Seq-based gene expression estimates**

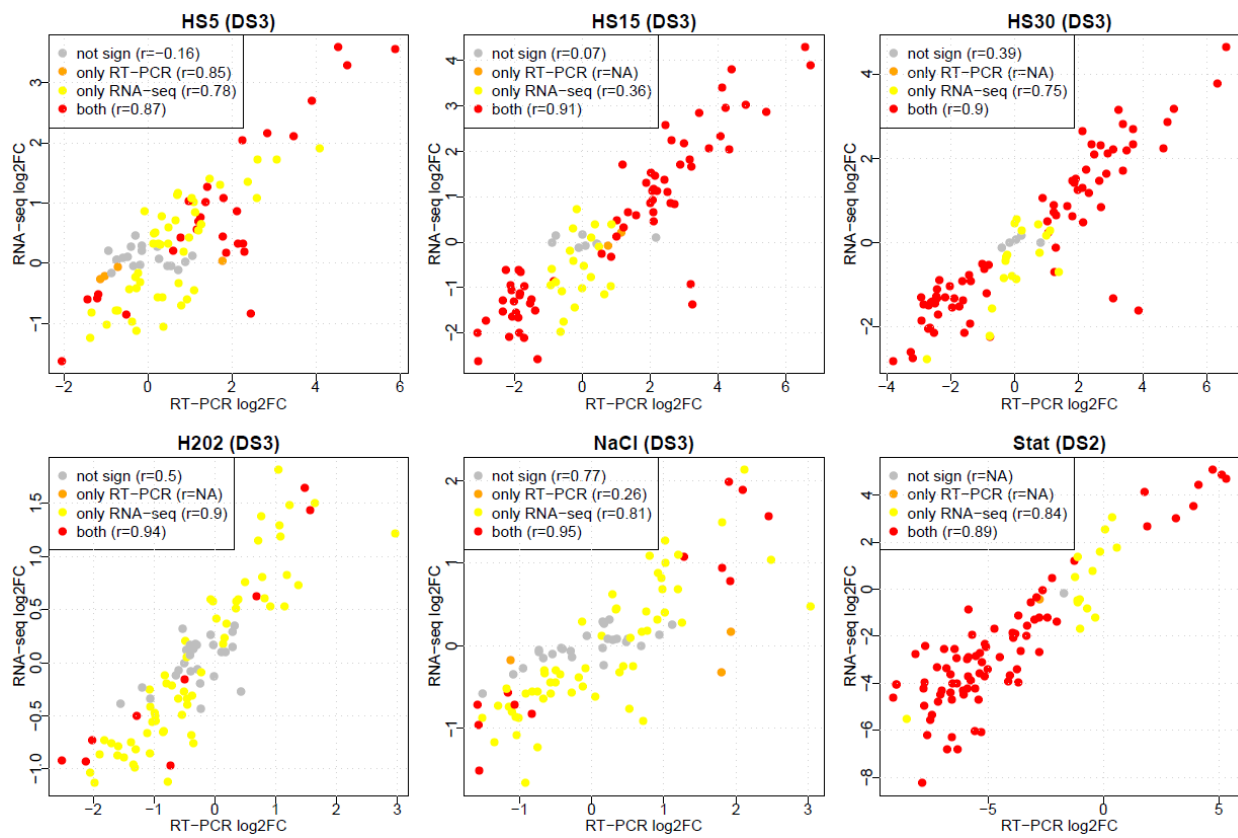

**Figure S3. Correlation between RT-PCR- and RNA-Seq-based gene expression fold change estimates**

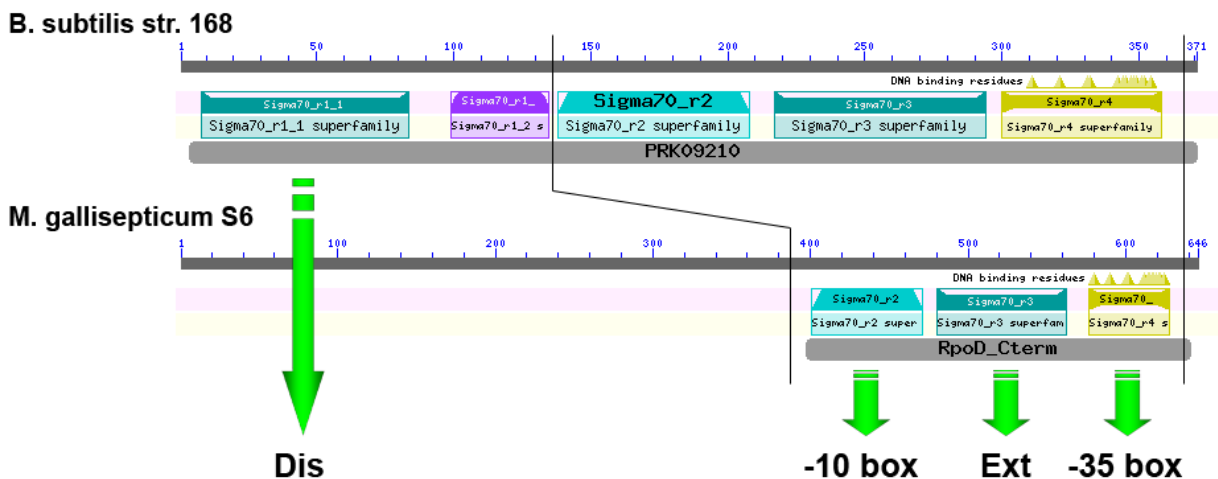

#### Figure S4. Sigma factor structure

Structure of *M. gallisepticum* S6 main sigma factor *rpoD* in comparison with *B. subtilis subsp. subtilis str 168* main sigma factor *rpoD (sigA)*. Domains are identified by NCBI CDD. N-terminal fragment of sigma factor is replaced in *M. gallisepticum* with a sequence of an unknown function. Discriminator-binding region is absent. C-terminal sequence with -10 and -35 binding regions is present in *M. gallisepticum*.

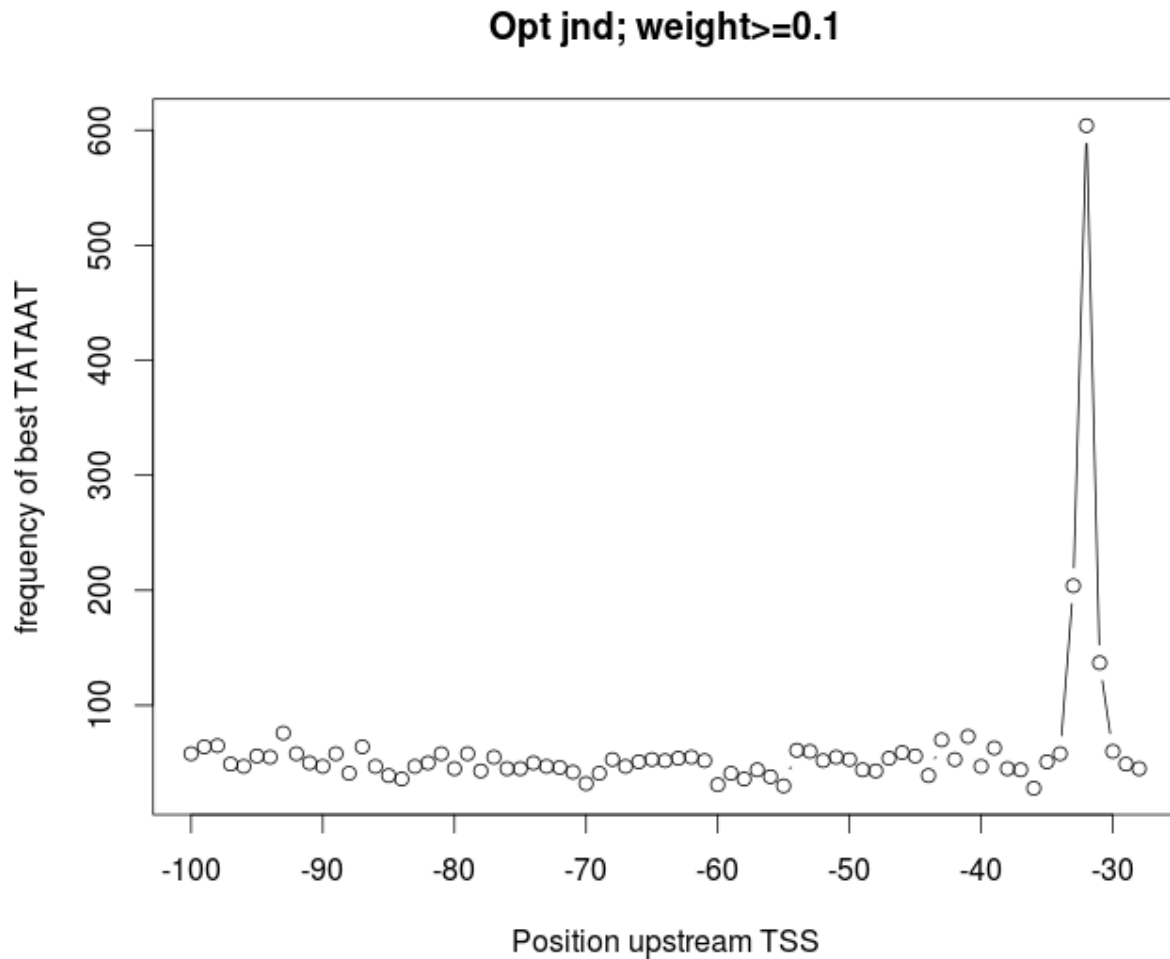

#### Figure S5. Distribution of best match of promoter PWM in 100nt upstream of TSSs

Distribution of position of a best match with weight above 0.1 (averaged by all PWM positions) for promoter PWM in 100nt upstreams of 32148 possible TSS (peaks of read coverage detected in at least one 5'-ERS sample).

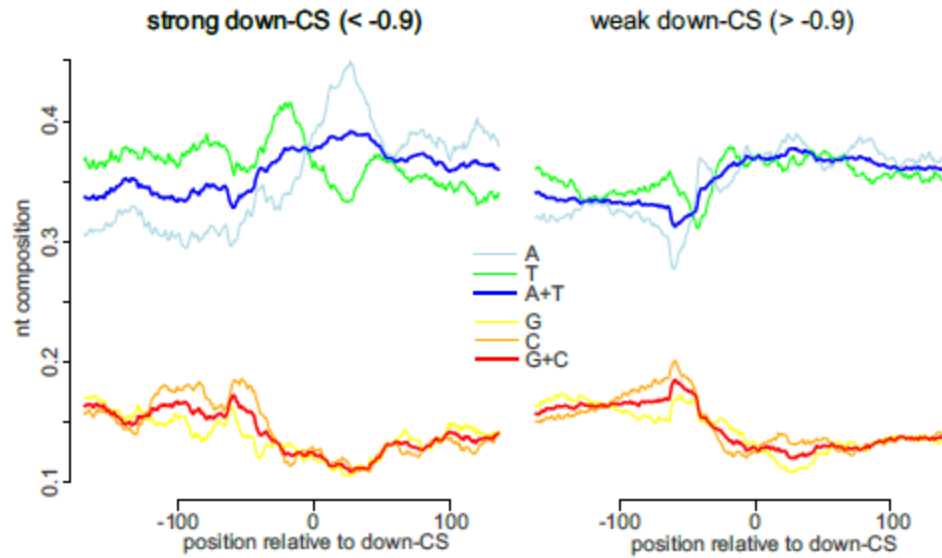

**Figure S6. AT-content near down-CS.**

Average nt-content of  $\pm 150$ nt region around strong (relative step size below  $-0.9$ , left) and weak (relative step size above  $-0.9$ , right) down-CS

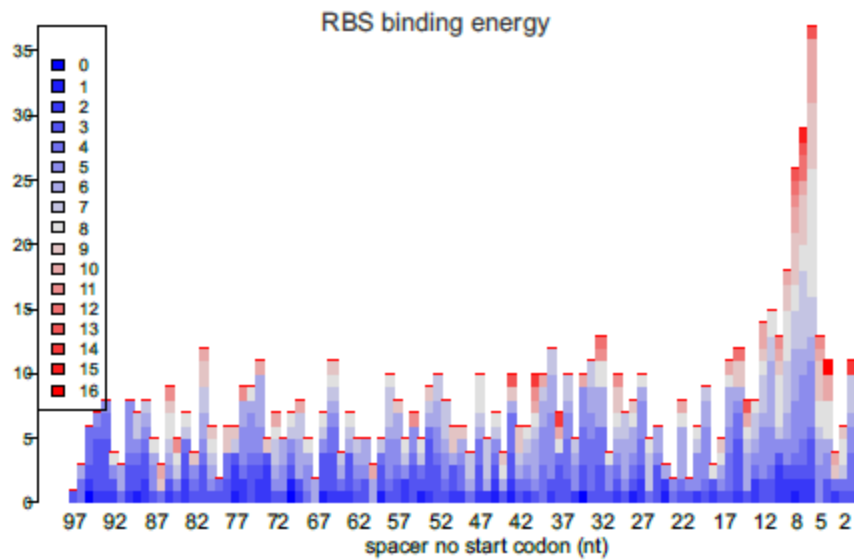

**Figure S7. Ribosome binding energy**

Distribution of best RBS by free energy (in  $-kcal/mol$ ) of duplex (color) and position relative to start codon.



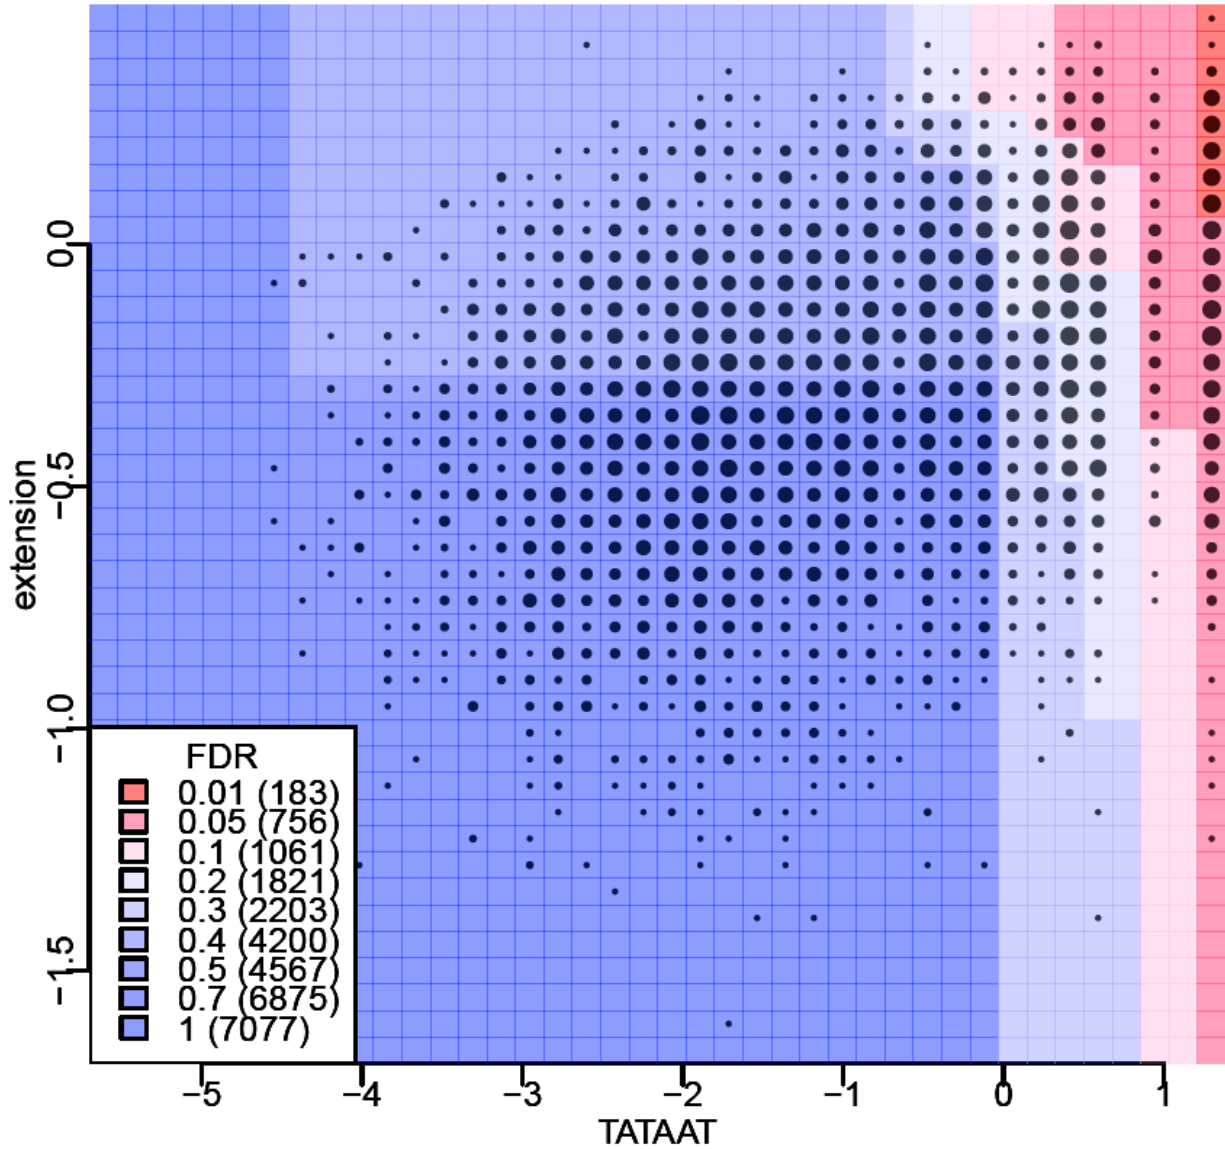

**Figure S8. Dependence of FDR of -10 box and extension weights**

Distribution of 7077 possible TSS, that were detected either in two control 5'-ERS samples or in two heat shock samples or both, by PWM weight of -10 box and it's extension (20 nt upstream and 3 nt downstream of -10 box) sequence. Sizes of point are proportional to log of number of TSS in corresponding bin. Dependence of FDR on weight of extension is shown by color in each column. Numbers of TSS with FDR below given cutoff are listed in legend.

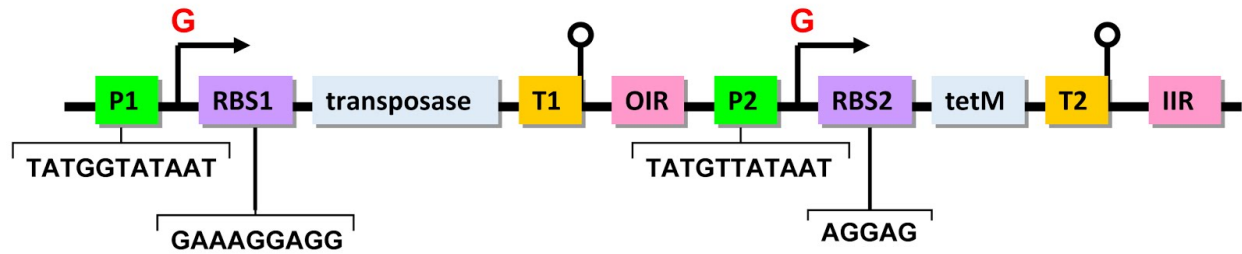

**Figure S9. Vector design for *M. gallisepticum* transformation**

P1, P2 - promoters, RBS1, RBS2 - ribosome binding sites, T1, T2 - intrinsic terminators (T1 is rRNA precursor terminator, T2 is *dps* terminator), transposase - Tn4001 transposase gene, tetM - tetracycline resistance gene, OIR and IIR - inverted repeats required for transposition. Red letter above TSS position shows first nucleotide of the transcript. For sequence and detailed annotation see supplementary file supplementaryFile.vector.gb.

```

rpsP-----GGCACTGAACAATCAGTTAAGTAATTTTACT-31
tetM-----ATTCCTGAACAATCAGTTAAGTAATTTTACT-31
transposase-----ATATTCTTCTTTAAGAAAT-19

rpsP-----TAACGATATGTTATAAATATTTCAGTTAGAAA-62
tetM-----TAATGATATGTTATAAATATTTCAGTTAGAAA-62
transposase-AATTAAATATGGTATAAATATTTTAGTTAGAAA-50

rpsP-----AATTT--AAGGACA-AATAAC-----ATG-83
tetM-----AATTT--AAGGAGA-AATAACGGATCC-ATG-89
transposase-AATTTGAAAGGAGGTAATAACAAGATCTATG-81

```

**Figure S10. Alignment of upstream regions of *rpsP* (prototype), *tetM* and transposase.**

Yellow highlights core promoter (including Ext-element, -35 box is absent), blue highlights RBS, italic shows initiator nucleotide, start codon is shown in bold. Optimized nucleotides are underlined.

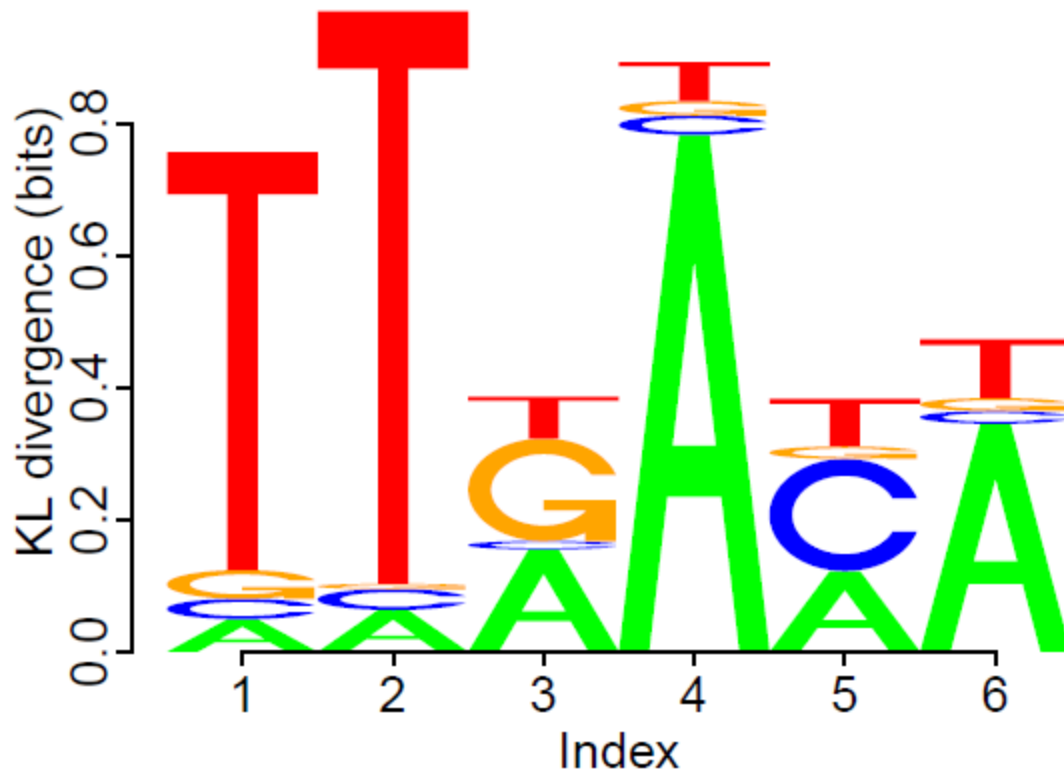

**Figure S11. Logo-image of -35 box**

122 promoters that have TTGACA sequence with not more than two mismatches was used to plot the figure.

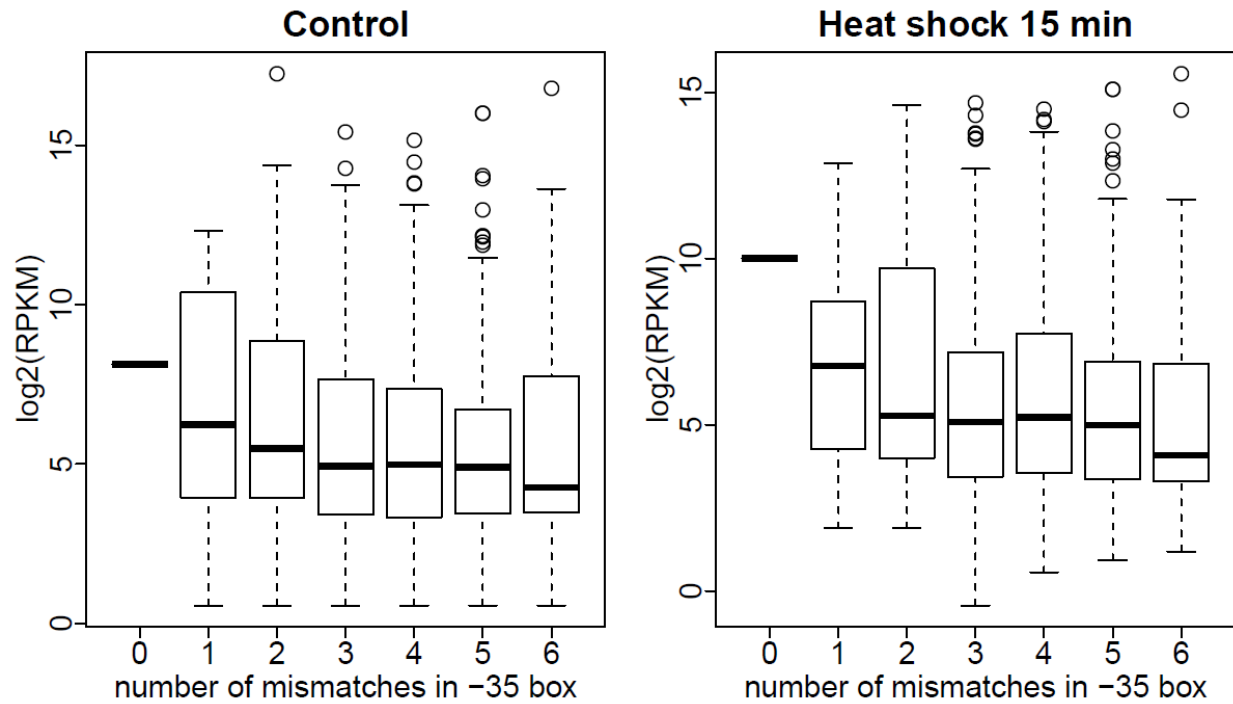

**Figure S12. Dependence of TSS activity on number of mismatches in -35 box compared with consensus sequence (TTGACA)**

TSSs with less than three mismatches have significantly greater activity than others (Two-sided Wilcoxon test,  $p_v < 0.004$  and  $0.002$  for control conditions and heat shock respectively).
